# Supplementary material
Source: Royal Society of Chemistry journal article supplement (doi:10.1039/d6ta00403b)
Supplement: d6ta00403b2.pdf [file d6ta00403b2.pdf]

## Supporting Information

### Stabilization of various phases of MnO<sub>2</sub> for affordable supercapacitor

Anupama Devi, Vibham Mishra, Upakar Patel, Alok Kumar, Pralay Maiti\*

School of Material Science and Technology, Indian Institute of Technology (Banaras  
Hindu University), Varanasi 221005, India.

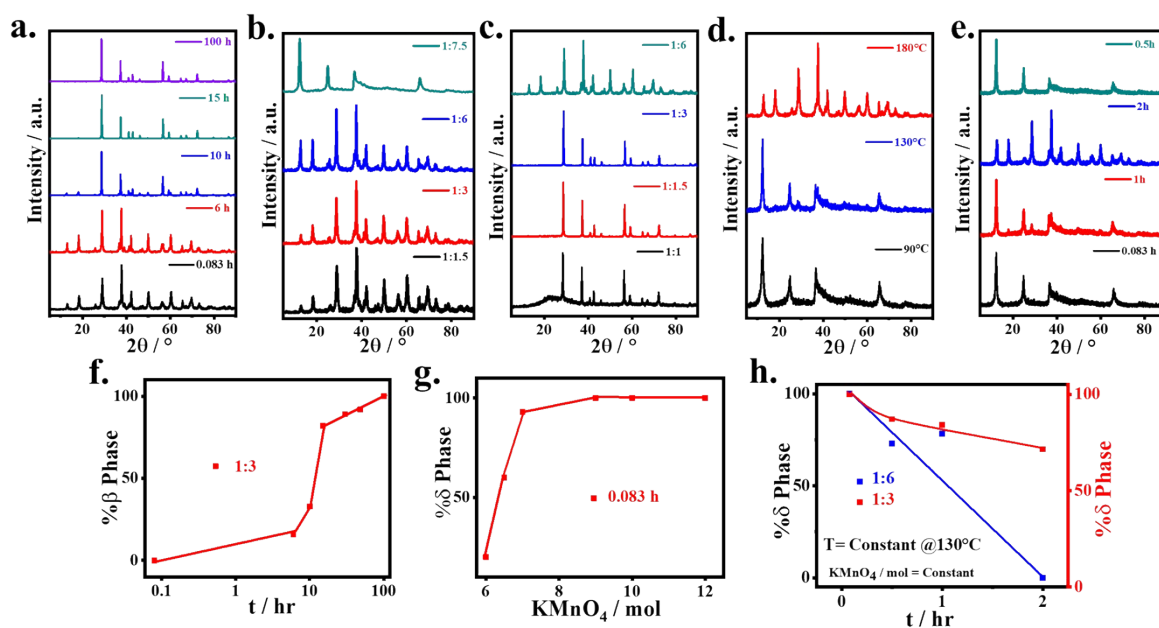

**Figure S1.** (a) XRD patterns of MnO<sub>2</sub> samples synthesized at 180 °C with increasing reaction time at a KMnO<sub>4</sub>:APS molar ratio of 1:3. (b) XRD patterns of samples prepared at 180 °C and 0.083 hours with varying precursor concentration ratios. (c) XRD patterns of samples synthesized at 180 °C and 15 h with varying precursor concentration ratios. (d) XRD patterns of samples synthesized at different temperatures while maintaining constant concentration ratio (1:3) and reaction time (1 hour). (e) XRD patterns of samples synthesized at 130 °C with increasing reaction time at 1:6 molar ratio. (f) Variation in the percentage of β-MnO<sub>2</sub> with respect to α-MnO<sub>2</sub> at a constant temperature (180 °C) and concentration ratio (1:3). (g) Variation in the percentage of δ-MnO<sub>2</sub> with respect to α-MnO<sub>2</sub> at a constant temperature (180 °C) and reaction time (0.083 h) (h) Variation in the percentage of δ-MnO<sub>2</sub> with respect to α-MnO<sub>2</sub> at constant temperature (180 °C) and concentration ratio (1:3).

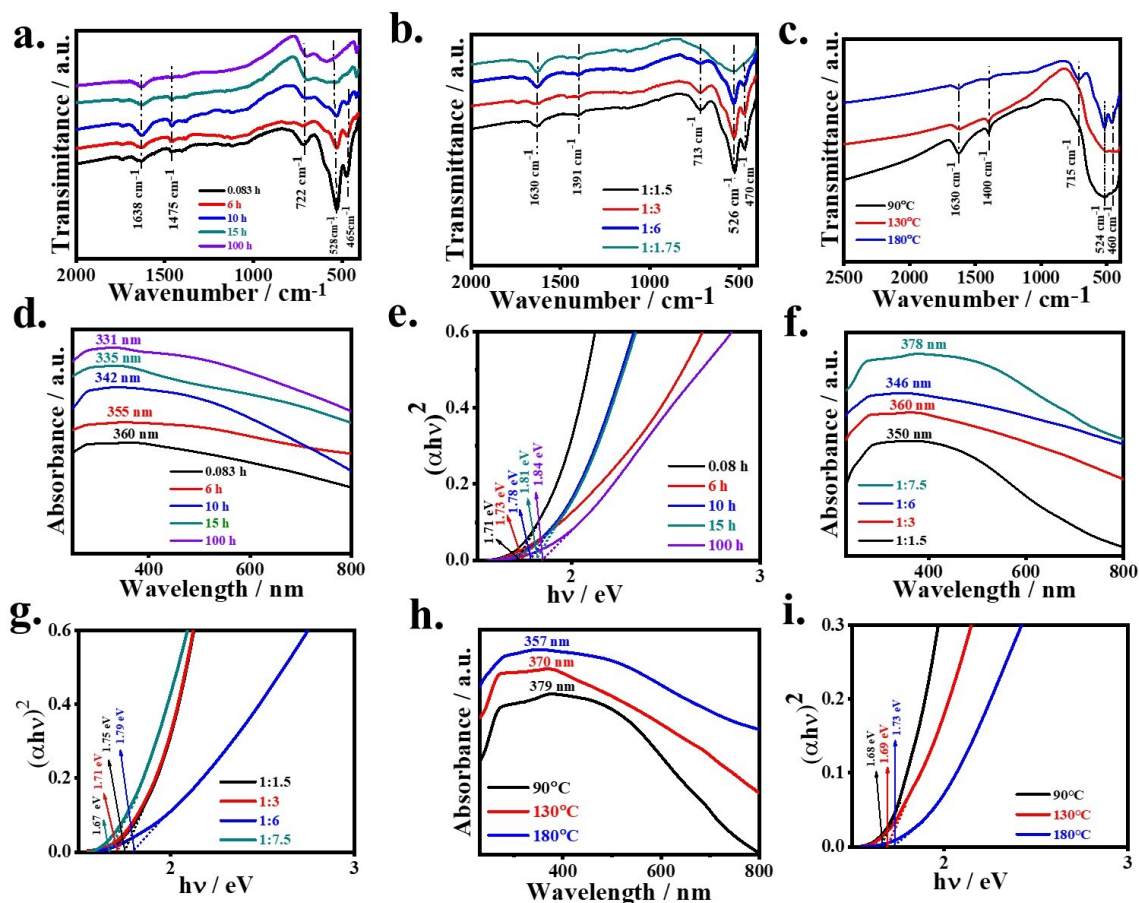

**Figure S2:** (a) FTIR Spectra of MnO<sub>2</sub> samples synthesized at 180 °C with increasing reaction time at 1:3. (b) FTIR patterns of samples prepared at 180 °C and 0.083 h with varying precursor concentration ratios (c) FTIR Spectra of samples synthesized at different temperatures while maintaining constant concentration ratio (1:3) and reaction time (1 h). (d) UV Spectra of samples prepared at 180 °C and 0.083 h with varying precursor concentration ratios (e) Tauc plots of samples prepared at 180 °C and 0.083 h with varying precursor concentration ratios (f) UV patterns of samples prepared at 180 °C and 0.083 h with varying precursor concentration ratios (g) Tau plot of samples prepared at 180 °C and 0.083 h with varying precursor concentration ratios (h) UV Spectra of samples synthesized at different temperatures while maintaining constant concentration ratio (1:3) and reaction time (1 h) (i) Tau plot of samples synthesized at different temperatures while maintaining constant concentration ratio (1:3) and reaction time (1 h).

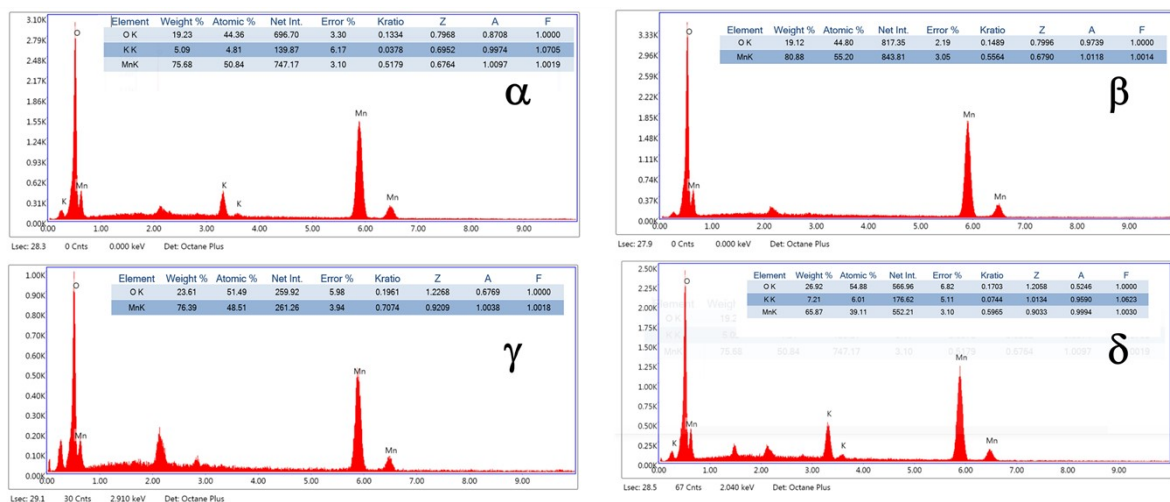

Figure S3: represents the EDS of  $\alpha$ - $\beta$ - $\gamma$ - and  $\delta$ -MnO<sub>2</sub> respectively.

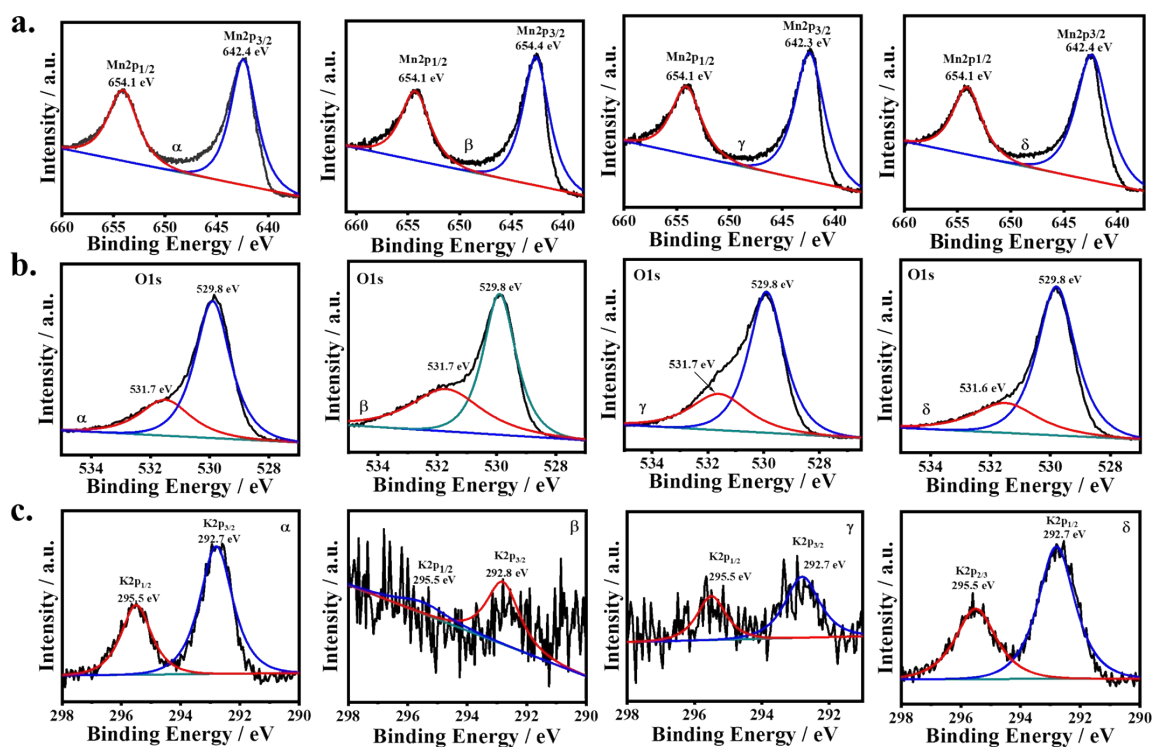

Figure S4: (a) Deconvoluted Mn2p XPS spectra, (b) deconvoluted O1s XPS spectra, and (c) deconvoluted K2p XPS spectra of  $\alpha$ -,  $\beta$ -,  $\gamma$ -, and  $\delta$ -MnO<sub>2</sub> phases.

**Table S1.**

| Element | XPS (%)  |         |          |          | EDS (%)  |         |          |          |
|---------|----------|---------|----------|----------|----------|---------|----------|----------|
|         | $\alpha$ | $\beta$ | $\gamma$ | $\delta$ | $\alpha$ | $\beta$ | $\gamma$ | $\delta$ |
| Mn      | 6.29     | 11.62   | 14.37    | 10.54    | 50.84    | 55.20   | 51.49    | 39.11    |
| O       | 56.42    | 49.37   | 56.32    | 53.60    | 44.34    | 44.80   | 48.51    | 54.88    |
| K       | 0.10     | <1      | <1       | 0.56     | 4.81     | -       | -        | 6.01     |

**Table S1** shows the atomic percentage of elements from XPS and EDS

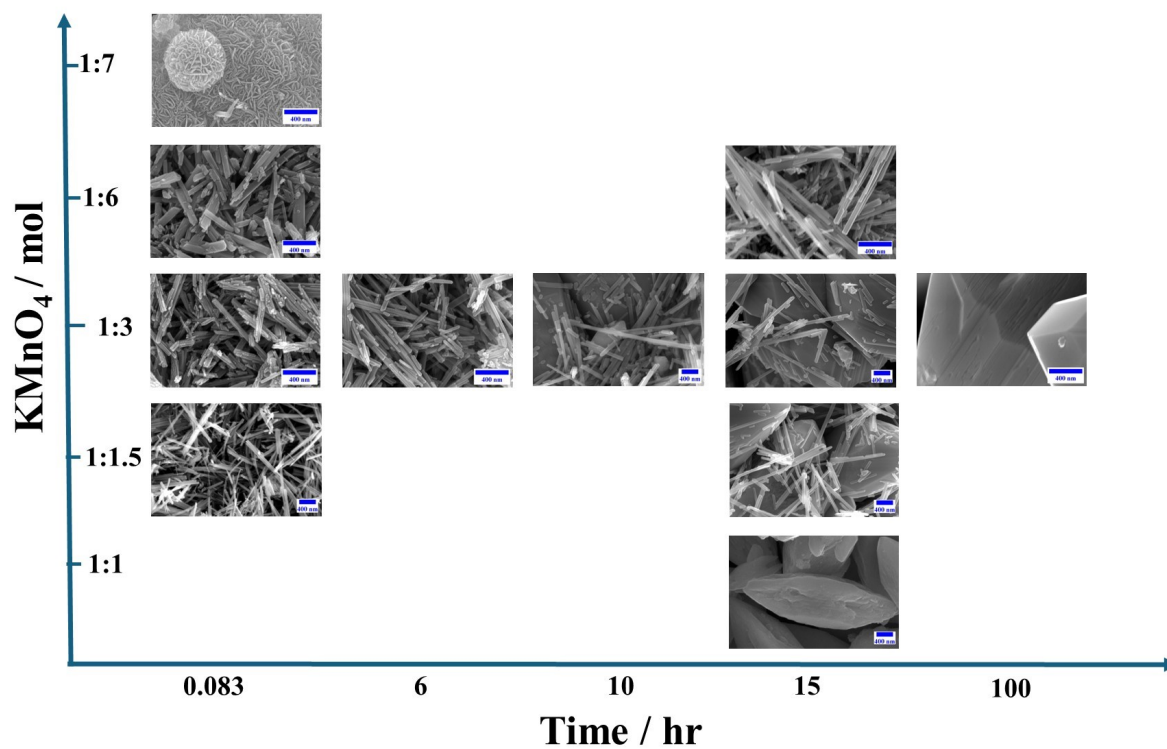

**Figure S5 :** Represents the variation of morphology with respect to time and concentration.

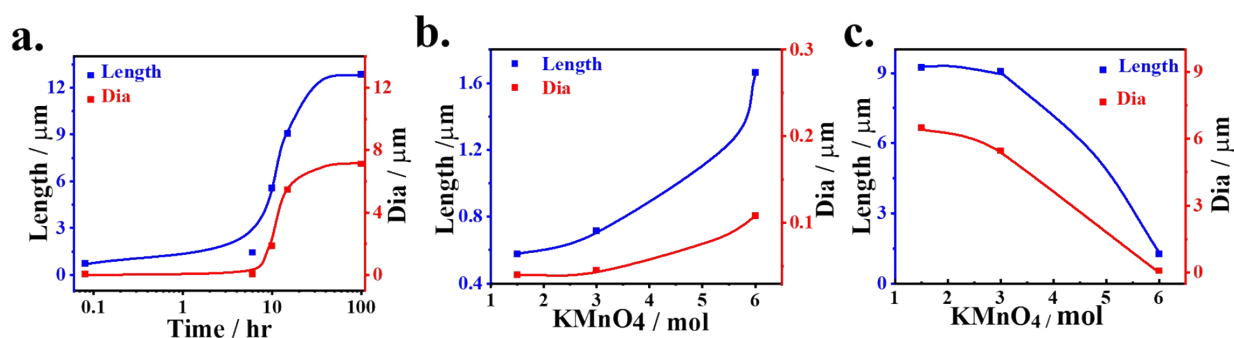

**Figure S6 :** (a) represents the variation of length and diameter with respect to time at constant temperature ( $180\text{ }^\circ\text{C}$ ) and molar ratio (1:3). (b) represents variation length and dia with respect to concentration at constant temperature ( $180\text{ }^\circ\text{C}$ ) and time (0.083 h) (c) represents variation length and dia with respect to concentration at constant temperature ( $180\text{ }^\circ\text{C}$ ) and time (15hr)

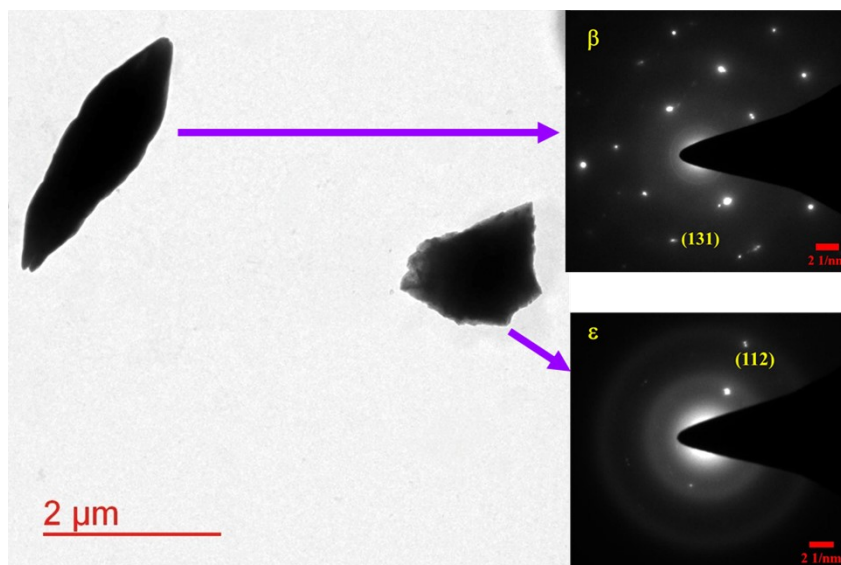

**Figure S7:** Represent Tem analysis of  $\beta$ -MnO<sub>2</sub> with 40%  $\epsilon$ -MnO<sub>2</sub>.

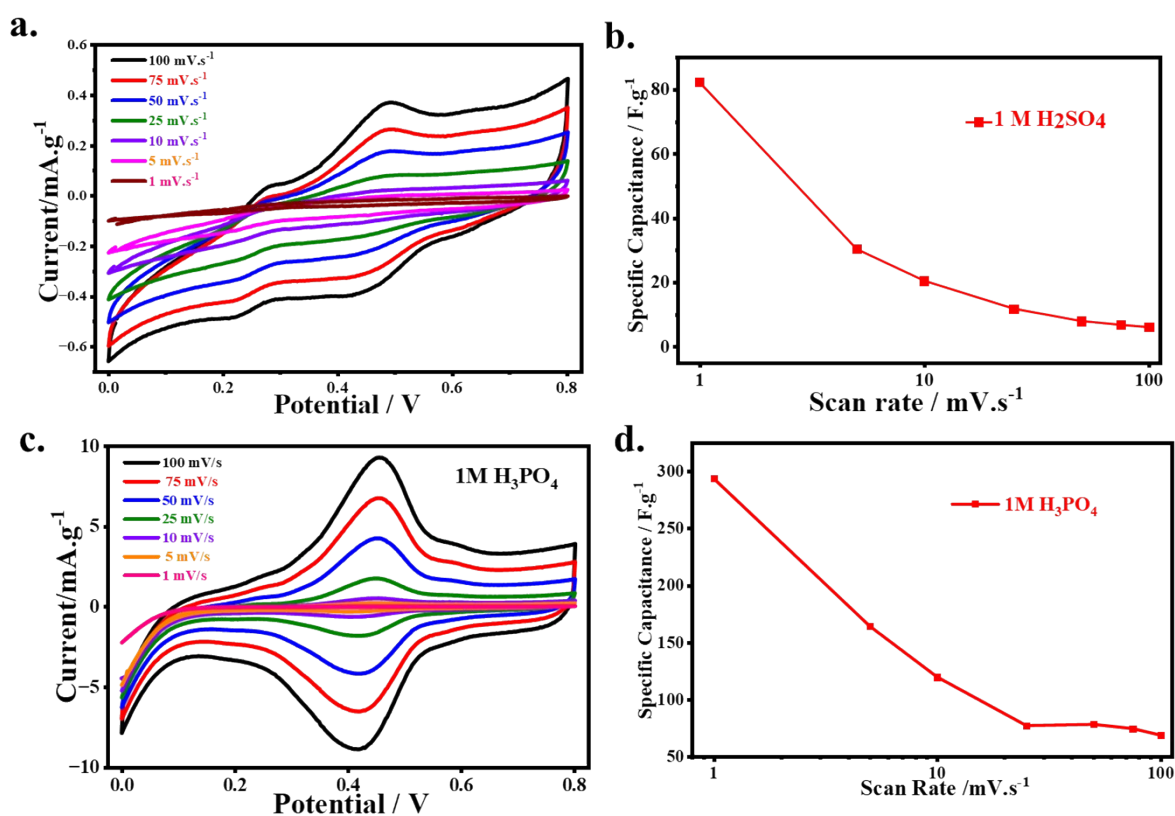

**Figure S8:** (a) Cyclic voltammetry of  $\gamma$ -MnO<sub>2</sub> electrode in 1M H<sub>2</sub>SO<sub>4</sub> (b) Specific capacitance of  $\gamma$ -MnO<sub>2</sub> electrode in 1M H<sub>2</sub>SO<sub>4</sub> with respect to scan rate (c) Cyclic voltammetry of  $\gamma$ -MnO<sub>2</sub> electrode in 1M H<sub>3</sub>PO<sub>4</sub> (d) Specific capacitance of  $\gamma$ -MnO<sub>2</sub> electrode in 1M H<sub>3</sub>PO<sub>4</sub> with respect to scan rate

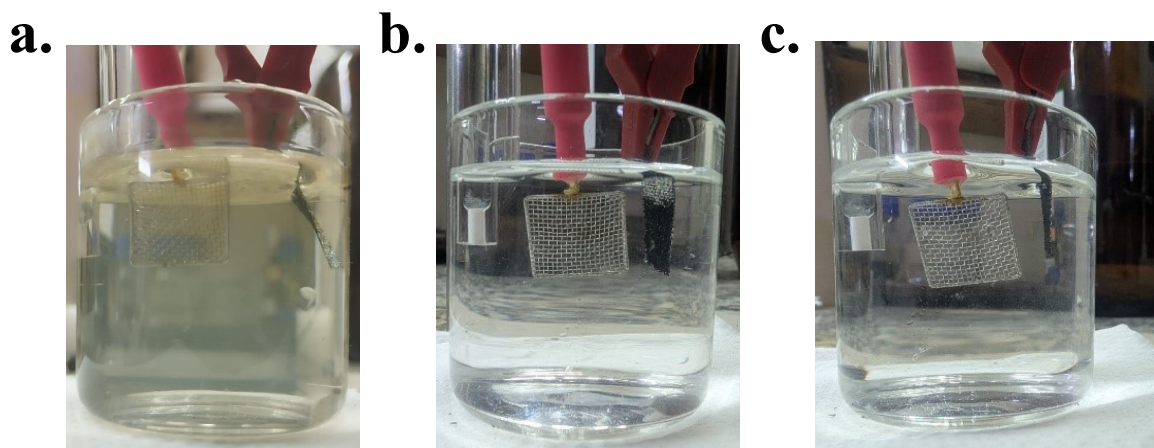

**Figure S9:** (a) image of solution showing coloration from electrolyte of 1M  $\text{H}_2\text{SO}_4$  showing light yellow colour; (b) image of solution showing no coloration from electrolyte of 1M  $\text{H}_3\text{PO}_4$ ; and (c) image of solution showing no coloration from electrolyte of 1M  $\text{Na}_2\text{SO}_4$ .

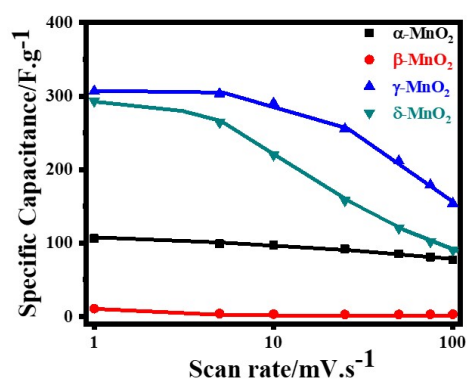

**Figure S10:** Represent scan rate dependency of polymorphs of  $\text{MnO}_2$ .

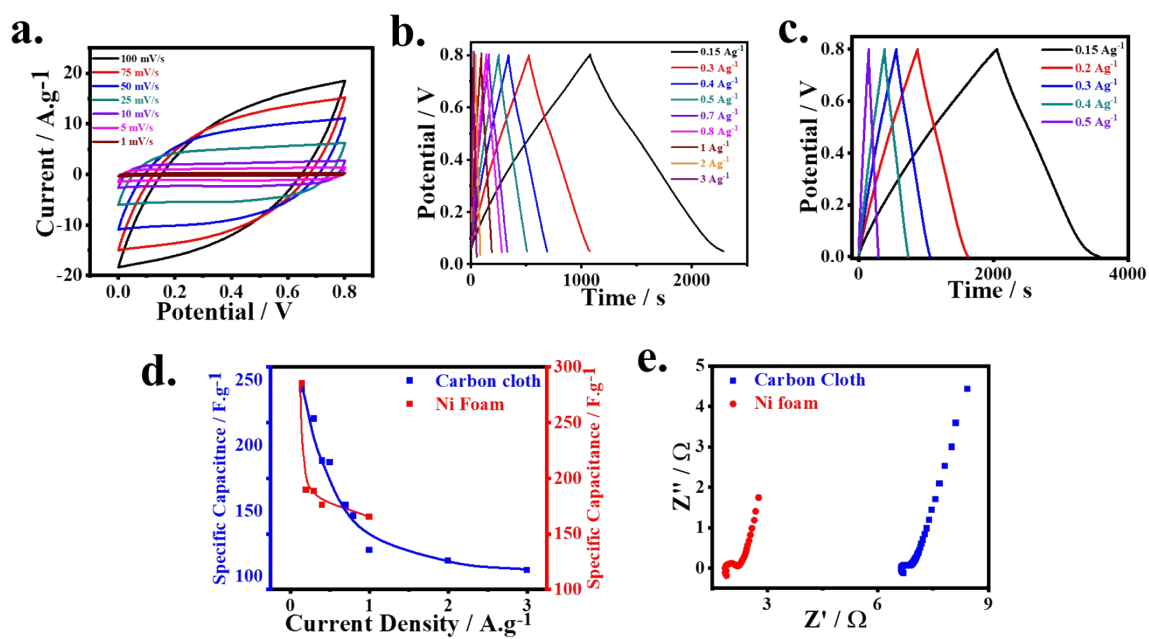

**Figure S11:** (a) Represents the CV of  $\gamma$ -MnO<sub>2</sub> using Ni foam as the current collector. (b) Represents the GCD of  $\gamma$ -MnO<sub>2</sub> using carbon cloth as the current collector. (c) Represents the GCD of  $\gamma$ -MnO<sub>2</sub> using Ni foam as the current collector. (d) Represents the specific capacitance of  $\gamma$ -MnO<sub>2</sub> as a function of current density using carbon cloth and Ni foam as current collectors. (e) Represents the EIS spectra of  $\gamma$ -MnO<sub>2</sub> using carbon cloth and Ni foam as current collectors.

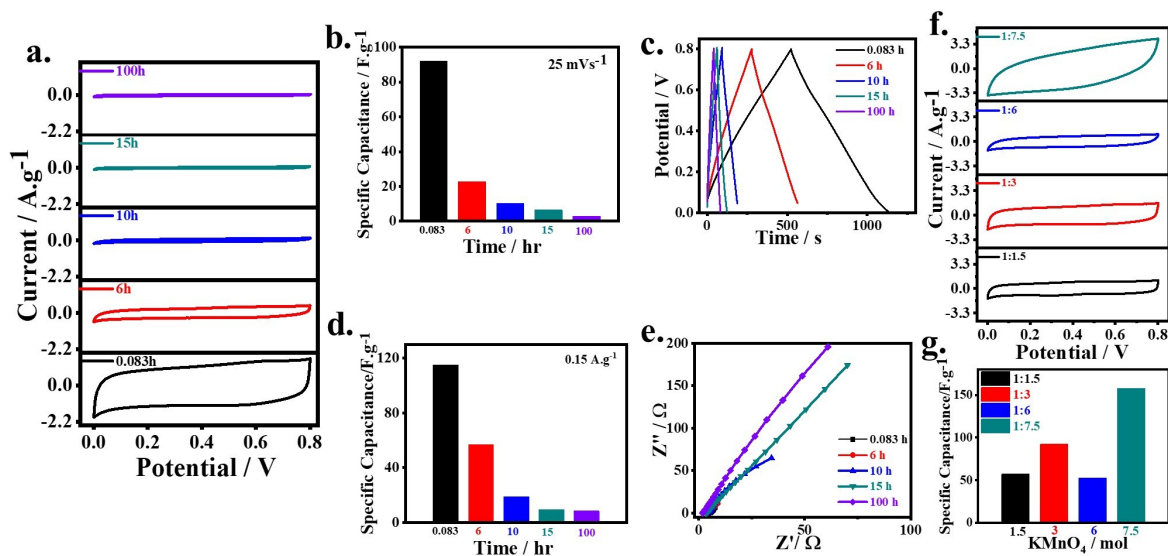

**Figure S12:** (a) Represents the CV of MnO<sub>2</sub> samples synthesized at 180 °C with increasing reaction time at a molar ratio of 1:3. (b) Represents the specific capacitance with respect to reaction time at a constant temperature (180 °C) and concentration ratio (1:3) at a scan rate of 25 mV s<sup>-1</sup>. (c) Represents the GCD curves with respect to reaction time at a constant temperature (180 °C) and concentration ratio (1:3). (d) Represents the specific capacitance with respect to reaction time at constant temperature (180 °C) and concentration ratio (1:3) at current density of 0.15 A g<sup>-1</sup>. (e) Represents the EIS spectra with respect to reaction time at constant temperature (180 °C) and concentration ratio (1:3). (f) Represents the CV of MnO<sub>2</sub> samples at different concentrations at a constant temperature (180 °C) and reaction time (0.083 h). (g) Represents the specific capacitance of MnO<sub>2</sub> samples at a constant temperature (180 °C) and reaction time (0.083 h).

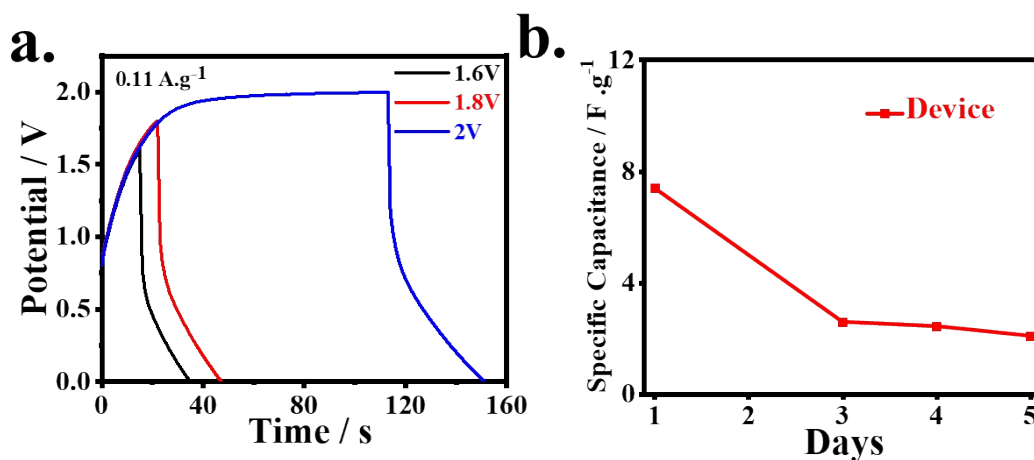

**a.** GCD curves for a device at different voltages (1.6V, 1.8V, 2V) at a current density of 0.11 A.g<sup>-1</sup>. **b.** Specific capacitance (F.g<sup>-1</sup>) of the device over 5 days.

**Figure S13:** (a) GCD of Device at  $0.11\text{A.g}^{-1}$ . (b) Specific capacitance of the device using PVA/ $\text{H}_3\text{PO}_4$  electrolyte with respect to the time (days).

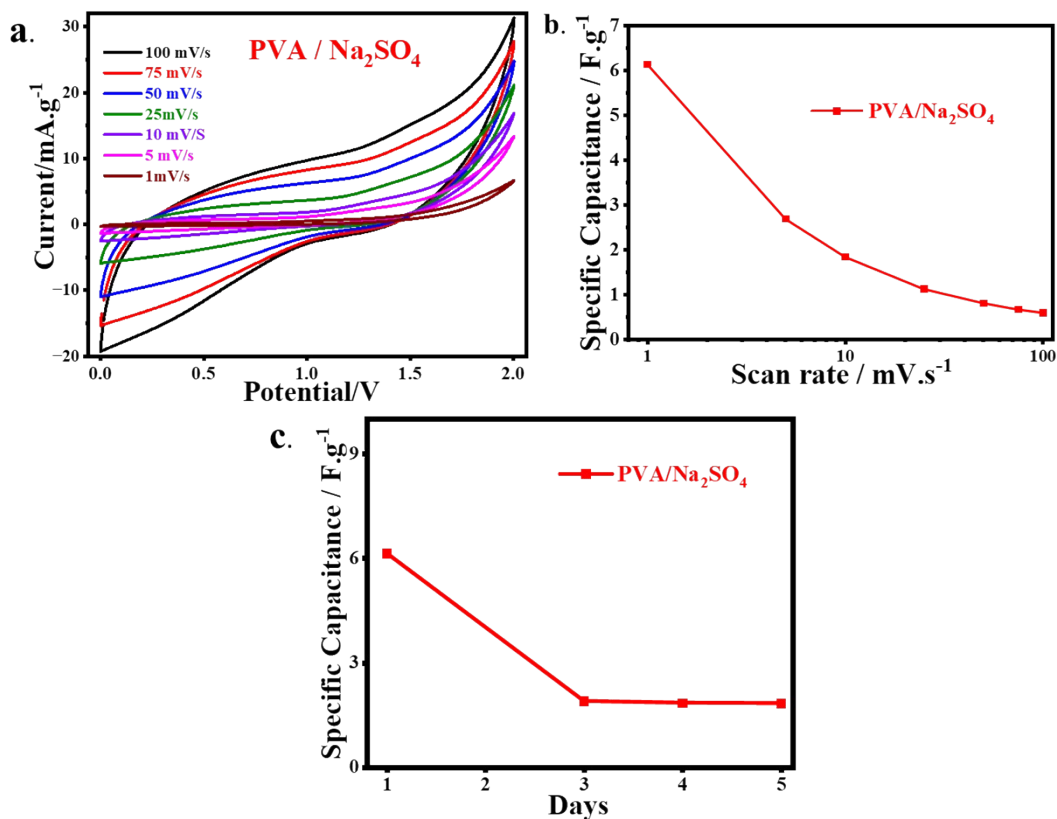

**Figure S14:** (a) Represent the Cyclic voltammetry of device using electrolyte of PVA/ $\text{Na}_2\text{SO}_4$ , (b) represent the specific capacitance of device using PVA/ $\text{Na}_2\text{SO}_4$  and (c) represent the specific capacitance of the device with respect to time (days).

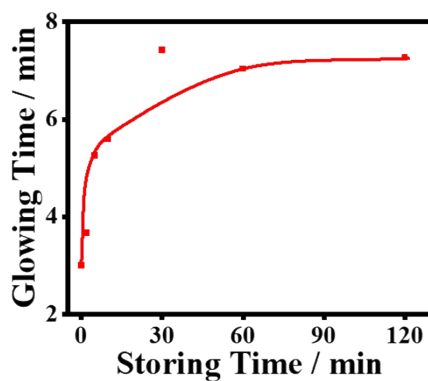

**Figure. S15:** represent the glowing time of LED light with respect to storing time.
